# Supplementary material for: Computational Modeling of PI3K/AKT Pathway in Bipolar Disorder and Type 2 Diabetes: Implications for Lithium Treatment and Curcumin as a Potential Alternative
Source: MDPI journal article supplement (doi:10.3390/ijms262010026), 2025-10-15
Supplement: s1 [file Supplementary Figure S1_S2 & Table S3.pdf › Supplementary Figure S1_S2 & Table S3.pdf]

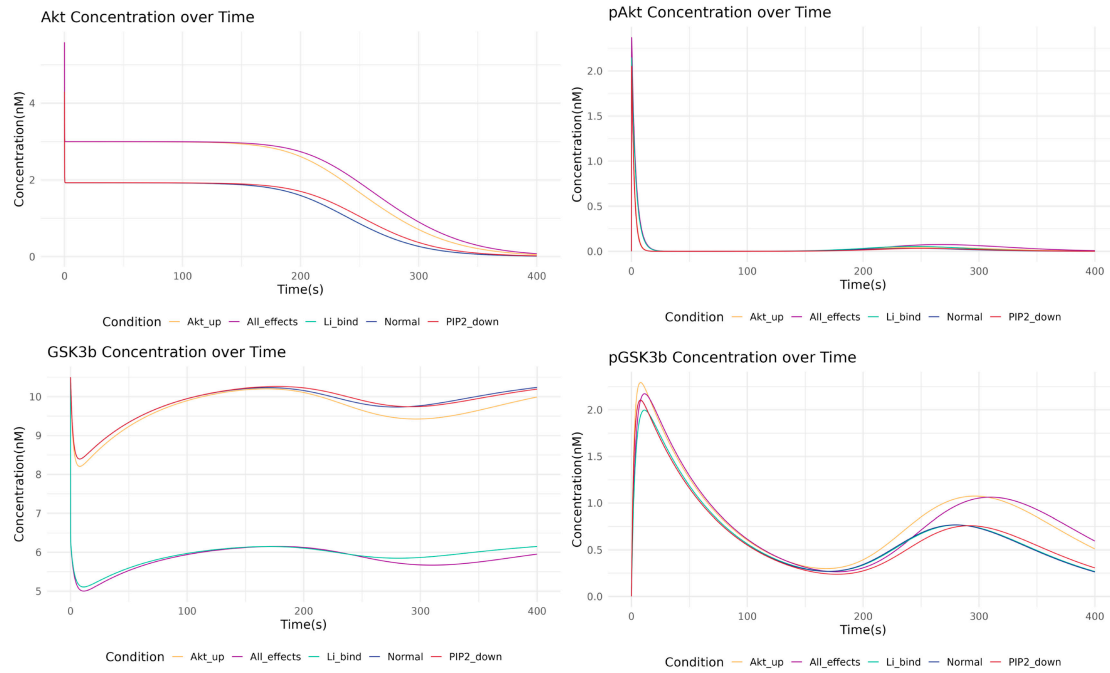

**Supplementary Figure S1.** Simulated effects of lithium's individual and combined mechanisms on the crosstalk network. Simulation conditions: (1) *AKT modulation* (Akt\_up, yellow) - 30% increase in initial AKT to simulate lithium's enhancement of AKT activity; (2) *PIP2 modulation* (PIP2\_down, red) - 37% decrease in initial PIP2 to represent lithium's inhibition of IMPase and subsequent reduction in PIP2 synthesis; (3) *GSK3 $\beta$ -Li Binding* (Li\_bind, green) – direct inhibition of GSK3 $\beta$  ( $K_i = 1000$  nM); (4) *Total Effects* (All\_effects, purple) – all mechanisms combined. Baseline is shown in blue for comparison.

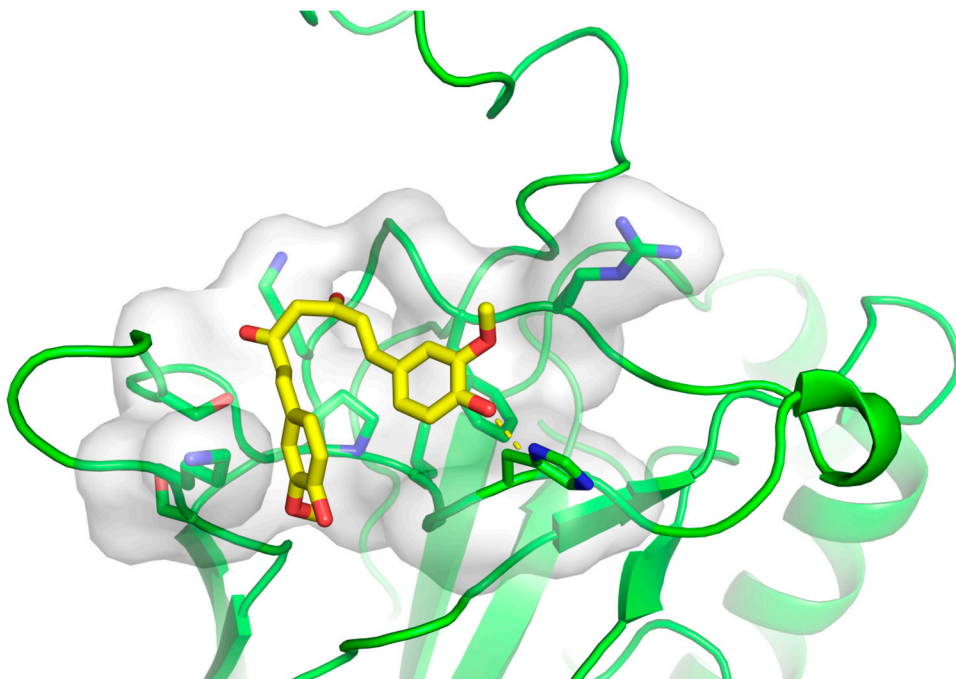

**Supplementary Figure S2.** Molecular docking result of curcumin bound to the NF- $\kappa$ B binding pocket. Curcumin demonstrates a strong binding affinity for NF- $\kappa$ B, with a calculated binding energy of -7.0 kcal/mol. Hydrogen bonds are represented by dashed lines.

**Supplementary Table S3.** Reaction substances and initial concentrations in the crosstalk network.

| ID  | Component     | Concentration (nM)   | References |
|-----|---------------|----------------------|------------|
| y1  | I             | 45                   | 24         |
| y2  | IR            | 150                  | 28         |
| y3  | IRL           | 0                    | -          |
| y4  | IRp           | $8.97 \cdot 10^{-4}$ | 29         |
| y5  | IRi           | 0                    | -          |
| y6  | IRS           | 300                  | 28         |
| y7  | IRp-IRS       | 0                    | -          |
| y8  | IRp-IRSp      | 0                    | -          |
| y9  | PTP1B         | 1                    | 29         |
| y10 | PI3K          | 200                  | 28         |
| y11 | IRSp-PI3K     | 7                    | *          |
| y12 | PIP2          | 11                   | 30         |
| y13 | PIP3          | 3.332                | 30         |
| y14 | PTEN          | 1                    | 28         |
| y15 | AKT           | 4.3                  | 32         |
| y16 | pAKT          | 0                    | -          |
| y17 | GSK3 $\beta$  | 10.5                 | 24         |
| y18 | pGSK3 $\beta$ | 0                    | -          |
| y19 | IP3           | 0                    | -          |
| y20 | DAG           | 0                    | -          |
| y21 | Ins           | 0                    | -          |
| y22 | PI            | 0                    | -          |
| y23 | PIP           | 0                    | -          |
| y24 | PKC           | 2                    | 30         |
| y25 | PKC_a         | 0                    | -          |
| y26 | G             | 10                   | -          |
| y27 | G_a           | 0                    | -          |

**Abbreviations:** Insulin (I), Insulin Receptor (IR), Insulin Receptor-Ligand complex (IRL), Phosphorylated Insulin Receptor (IRp), Insulin Receptor Substrate (IRS), Phosphorylated Insulin Receptor-IRS complex (IRp\_IRS), Phosphorylated Insulin Receptor-Phosphorylated IRS complex (IRp\_IRSp), Protein Tyrosine Phosphatase 1B (PTP1B), Phosphatidylinositol 3-kinase (PI3K), Phosphorylated IRS-PI3K complex (IRSp\_PI3K), Phosphatidylinositol 4,5-bisphosphate (PIP2), Phosphatidylinositol 3,4,5-trisphosphate (PIP3), Phosphatase and tensin homolog (PTEN), Protein Kinase B (AKT), Phosphorylated Protein Kinase B (pAKT), Glycogen Synthase Kinase 3 Beta (GSK3b), Phosphorylated Glycogen Synthase Kinase 3 Beta (pGSK3b), Inositol 1,4,5-trisphosphate (IP3), Diacylglycerol (DAG), Inositol (Ins), Phosphatidylinositol (PI), Phosphatidylinositol 4-phosphate (PIP), Protein Kinase C (PKC), Activated Protein Kinase C (PKC\_a), G protein (G), Activated G protein (G\_a).
